# Supplementary material for: Neurons secrete miR-132-containing exosomes to regulate brain vascular integrity
Source: PubMed Central journal article supplement (PMC5518987; doi:10.1038/cr.2017.62), 2017-04-21
Supplement: cr201762x1.pdf [file cr201762x1.pdf]

**Supplemental Information, Figure S1. Conserved *miR-132* is necessary for brain vascular integrity.** (A) Conservation of *miR-132* from *Drosophila* to Human. The red box shows the seed region of *miR-132*. (B) Whole-mount *in situ* hybridization showing that *miR-132* is highly expressed in the brain region of zebrafish embryos at 3 days post-fertilization (dpf). (C) Schematic showing the design of *miR-132* MO and *miR-132* loop MO. Target-1, *miR-132* MO targeting site; target-2, *miR-132* loop MO targeting site. The sequence of mature *miR-132* is in red. (D) Efficiency of MOs in downregulating *miR-132* expression in zebrafish embryos. The experiments were repeated 12 times. (E) Death rate of 1-dpf embryos injected with Ctrl MO or *miR-132* MO. The experiments were repeated 7 times. (F) Malformation rate of 3-dpf embryos injected with Ctrl MO and *miR-132* MO. The experiments were repeated 7 times. (G) Representative TEM images of a control embryo and a hemorrhagic *miR-132* morphant showing the accumulation of blood cells (red arrows) in the brain ventricle in *miR-132* morphant. (H) Representative projected confocal images showing 10-kDa dextran leakage from brain blood vessels in a 3-dpf Tg(Flk1:eGFP) *miR-132* morphant. The regions outlined by the white rectangles were enlarged. (I and J) Representative projected confocal time-lapse images showing that red fluorescent bead (100 nm in diameter) leaked from brain blood vessels in a 3-dpf Tg(Flk1:eGFP) control zebrafish (I) and *miR-132* morphant (J). In (J), beads leaked from two functional vessels (white circles) which already carried blood flow. Scale bar, 10  $\mu\text{m}$  (G), 100  $\mu\text{m}$  and 25  $\mu\text{m}$  (insert) (H), 100  $\mu\text{m}$  (left) and 50  $\mu\text{m}$  (right) (I and J). Error bars, SEM. n.s., no significant; \* $P < 0.05$ , \*\* $P < 0.01$  (one-way ANOVA with post-hoc Tukey's multiple comparison test for (D); unpaired two-tailed Student's *t* test for (E) and (F)).
