# Supplementary material for: Neurons secrete miR-132-containing exosomes to regulate brain vascular integrity
Source: PubMed Central journal article supplement (PMC5518987; doi:10.1038/cr.2017.62), 2017-04-21
Supplement: cr201762x2.pdf [file cr201762x2.pdf]

**A**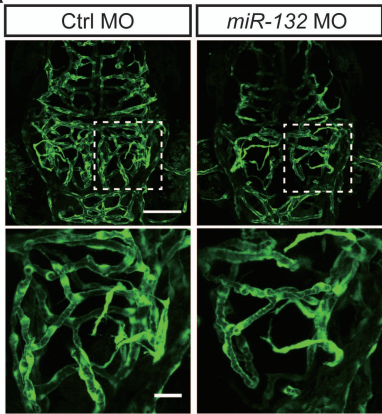**B**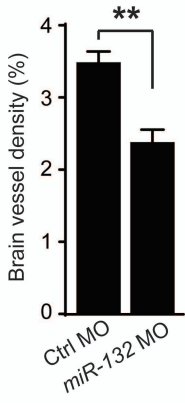

**Supplementary Information, Figure S2. *MiR-132* knockdown reduces brain vascular density.** (A and B) Representative projected confocal images (A) of 3-dpf Tg(Flk1:eGFP) larvae and summary data (B) showing that *miR-132* knockdown led to a decreased brain blood vessel density. 4 control embryos and 11 *miR-132* morphants were analyzed. Scale bars, 100  $\mu\text{m}$  (top) and 25  $\mu\text{m}$  (bottom) (A). Error bars, SEM.  $**P < 0.01$  (unpaired two-tailed Student's *t* test for (B)).
