# Supplementary material for: Neurons secrete miR-132-containing exosomes to regulate brain vascular integrity
Source: PubMed Central journal article supplement (PMC5518987; doi:10.1038/cr.2017.62), 2017-04-21
Supplement: cr201762x3.pdf [file cr201762x3.pdf]

**A**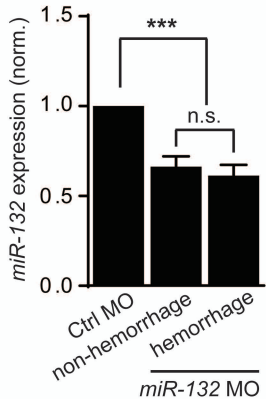**B**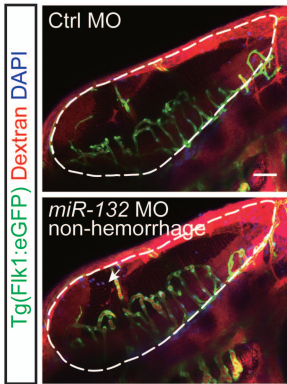**C**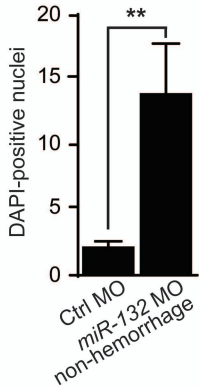

**Supplementary Information, Figure S3. Impairment of brain vascular integrity in non-hemorrhagic *miR-132* morphants.** (A) Relative expression of *miR-132* in non-hemorrhagic and hemorrhagic *miR-132* morphants. The experiments were repeated for 7 times. (B and C) Representative projected confocal images (B) and summary data (C) showing DAPI-positive nuclei (white arrows) in the brain parenchymal of non-hemorrhagic *miR-132* morphants. 7 Ctrl and 7 non-hemorrhagic *miR-132* morphants were analyzed. Scale bar, 50  $\mu\text{m}$  (B). Error bars, SEM. n.s., no significant;  $**P < 0.01$ ,  $***P < 0.001$  (one-way ANOVA with post-hoc Tukey's multiple comparison test for (A); unpaired two-tailed Student's *t* test for (C)).
