# Supplementary material for: Neurons secrete miR-132-containing exosomes to regulate brain vascular integrity
Source: PubMed Central journal article supplement (PMC5518987; doi:10.1038/cr.2017.62), 2017-04-21
Supplement: cr201762x4.pdf [file cr201762x4.pdf]

**Supplementary Information, Figure S4. Mutation of *miR-132* by CRISPR/Cas9. (A)**

Design of *miR-132* gRNA. The gRNA targets to the mature sequence of *miR-132* (marked by the line), and the PAM sequence is in green. **(B)** Sequence analysis of *miR-132* mutations caused by co-injection of zebrafish codon-optimized *Cas9* mRNA and *miR-132* gRNA. The red fonts show the target site of *miR-132* gRNA, yellow blanks show mutated sequences, and the green fonts show the PAM sequence. **(C)** Reduced expression of *miR-132* by co-injection of *Cas9* mRNA and *miR-132* gRNA. The experiments were repeated 5 times. Error bars, SEM. n.s., no significant; \*\* $P < 0.01$  (one-way ANOVA with post-hoc Tukey's multiple comparison test for **(C)**).
