# Supplementary material for: Neurons secrete miR-132-containing exosomes to regulate brain vascular integrity
Source: PubMed Central journal article supplement (PMC5518987; doi:10.1038/cr.2017.62), 2017-04-21
Supplement: cr201762x5.pdf [file cr201762x5.pdf]

**A**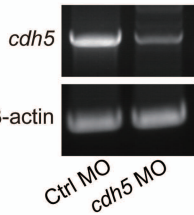**B**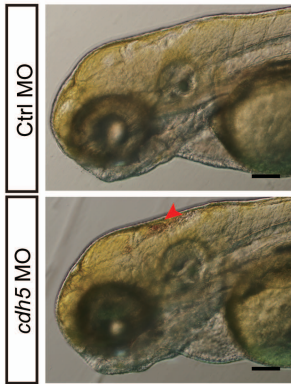**C**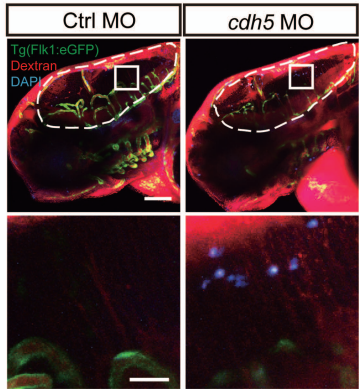

**Supplementary Information, Figure S5. *Cdh5* knockdown impairs brain vascular integrity in larval zebrafish.** (A) RT-PCR analysis showing that *Cdh5* MO significantly reduced the level of *Cdh5* mRNA. (B and C) Representative images showing that *Cdh5* knockdown caused intracranial hemorrhage (arrowhead in B) and DAPI leakage in the brain (C). Scale bars, 100  $\mu$ m (B), 100  $\mu$ m (top) and 20  $\mu$ m (bottom) (C).
