# Supplementary material for: Neurons secrete miR-132-containing exosomes to regulate brain vascular integrity
Source: PubMed Central journal article supplement (PMC5518987; doi:10.1038/cr.2017.62), 2017-04-21
Supplement: cr201762x6.pdf [file cr201762x6.pdf]

**A**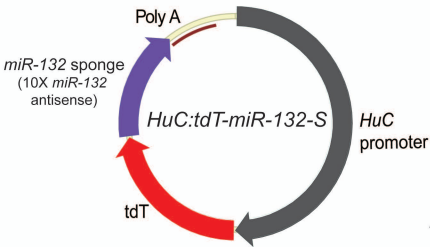**B**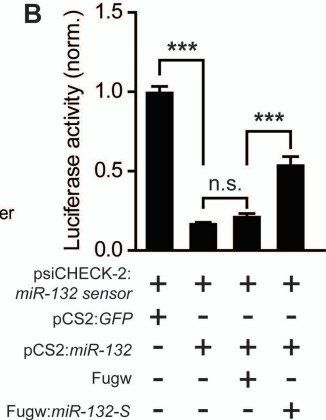

**Supplementary Information, Figure S6. Design and efficiency of *miR-132* sponge. (A)**

Schematic of *miR-132* sponge (*miR-132-S*), which contained ten repeats of *miR-132* antisense sequence and was inserted into the 3' UTR of *tdTomato* (*tdT*) in the *HuC* vector. **(B)** Luciferase assay in HEK293 cells showing the efficiency of *miR-132-S* in downregulating *miR-132*. The experiments were repeated 3 times. Error bars, SEM. n.s., no significant; \*\*\* $P < 0.001$  (one-way ANOVA with post-hoc Tukey's multiple comparison test for **(B)**).
