# Supplementary material for: Neurons secrete miR-132-containing exosomes to regulate brain vascular integrity
Source: PubMed Central journal article supplement (PMC5518987; doi:10.1038/cr.2017.62), 2017-04-21
Supplement: cr201762x7.pdf [file cr201762x7.pdf]

Tg(Flk1:eGFP), *HuC:tdT*

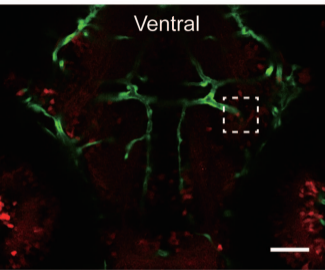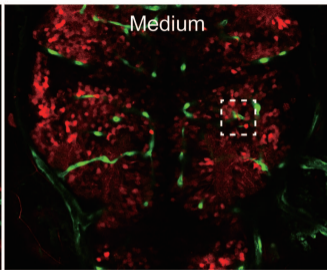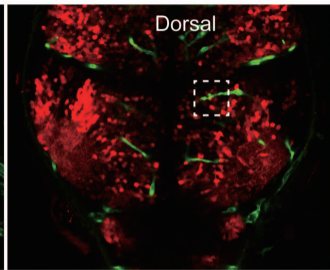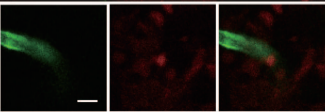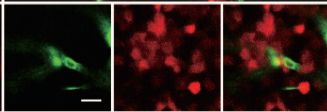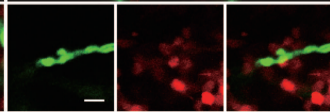

**Supplementary Information, Figure S7. No overlapping between *HuC*-driven tdTomato expression in neurons and *Flk1*-driven eGFP expression in ECs.** The *HuC:tdT* plasmid was transiently expressed in Tg(*Flk1:eGFP*) embryos. Representative single slice images at different optical sections showing intensive expression of tdTomato in neuronal somata and fibers, but not in any of eGFP-expressing endothelial cells. Scale bar, 50  $\mu\text{m}$  (top) and 10  $\mu\text{m}$  (bottom).
