# Supplementary material for: Neurons secrete miR-132-containing exosomes to regulate brain vascular integrity
Source: PubMed Central journal article supplement (PMC5518987; doi:10.1038/cr.2017.62), 2017-04-21
Supplement: cr201762x8.pdf [file cr201762x8.pdf]

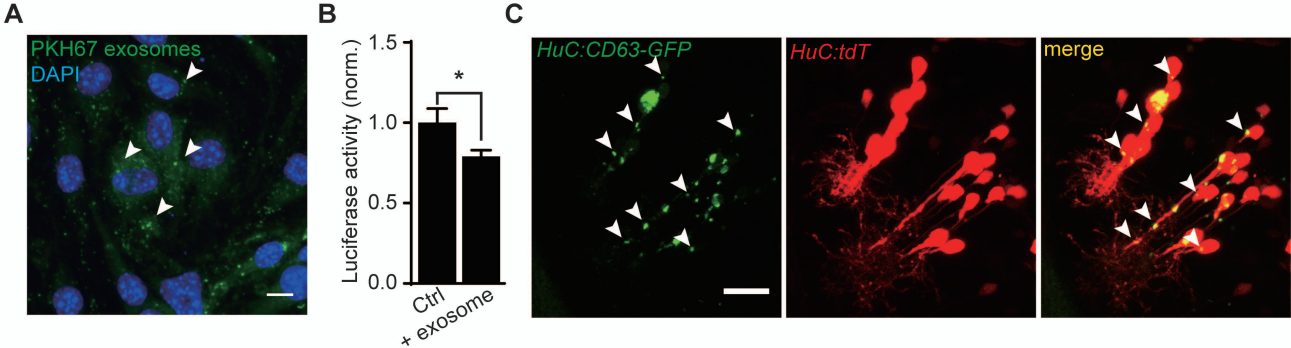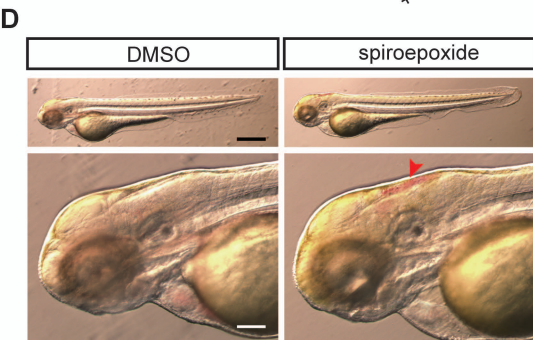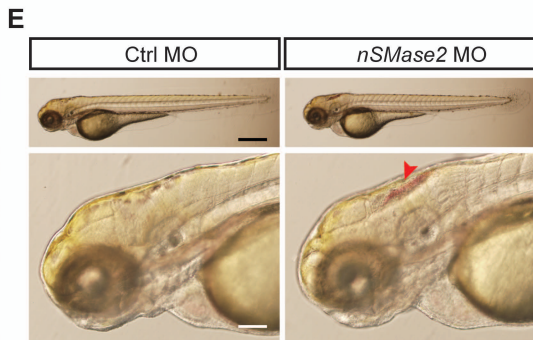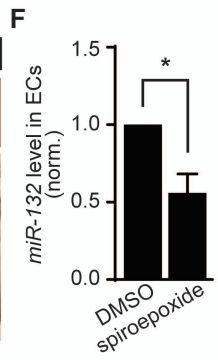

**Supplementary Information, Figure S8. Internalization of neuronal exosomes into ECs and effect of impaired exosome release on zebrafish intracranial hemorrhage. (A)** Neuronal exosomes stained with PKH67 (green dots, arrowheads) were taken up by confluent cultured b.End3 cells. DAPI staining was used for visualizing the nuclei of b.End3 cells. **(B)** Luciferase assay showing that neuronal exosomes (200 ×) repress the luciferase activity of the *miR-132* sensor in cultured b.End3 cells. The experiments were repeated 3 times. **(C)** *HuC:CD63-GFP* and *HuC:tdT* were co-injected into zebrafish embryos at one-cell stage. The images were taken at 3 dpf. Puncta-like CD63-GFP labeled exosomes (white arrowheads) were observed in neuronal somata and processes. **(D and E)** Representative images showing the intracranial hemorrhage (arrowheads) effect of nSMase2 blockade with spiroepoxide **(D)** or *nSMase2* knockdown with MO **(E)** in 3-dpf zebrafish larvae. **(F)** Reduced expression of *miR-132* in ECs by spiroepoxide treatment. Scale bar, 10 μm **(A)**, 20 μm **(C)**, 400 μm (top) and 100 μm (bottom) **(D and E)**. Error bars, SEM. \* $P < 0.05$  (unpaired two-tailed Student's *t* test for **(B)** and **(F)**).
