# Supplementary material for: Neurons secrete miR-132-containing exosomes to regulate brain vascular integrity
Source: PubMed Central journal article supplement (PMC5518987; doi:10.1038/cr.2017.62), 2017-04-21
Supplement: cr201762x9.pdf [file cr201762x9.pdf]

**A**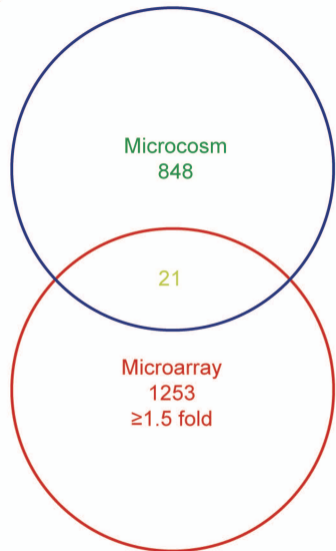**B**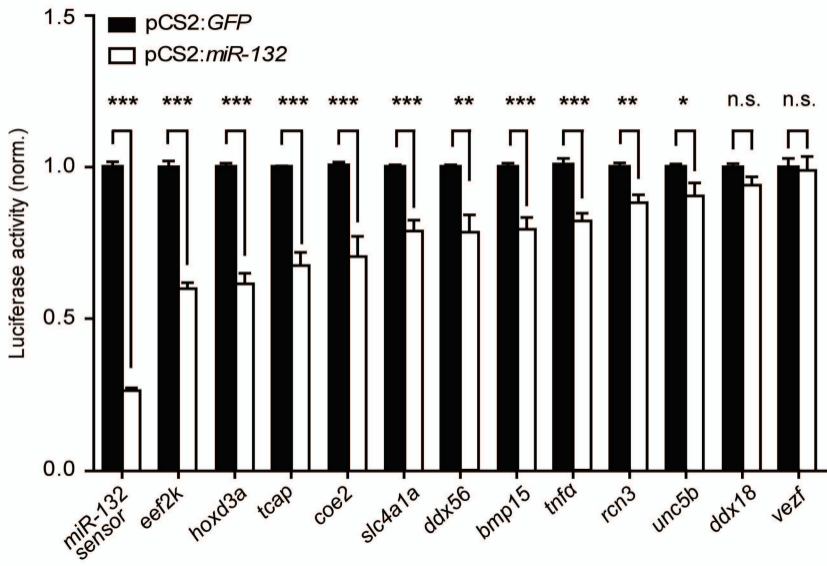

**Supplementary Information, Figure S9. Prediction of the target genes of *miR-132* in zebrafish.** (A) 21 candidate genes were got after combination of the microarray data and the predicted targets by the Microcosm algorithm. (B) Luciferase assay in HEK293 cells showing the repressing efficiency of *miR-132* on 12 annotated candidate genes. The experiments were repeated 3 times. Error bars, SEM. n.s., no significant; \* $P < 0.05$ , \*\* $P < 0.01$ , \*\*\* $P < 0.001$  (unpaired two-tailed Student's  $t$  test for (B)).
