# Supplementary material for: Neurons secrete miR-132-containing exosomes to regulate brain vascular integrity
Source: PubMed Central journal article supplement (PMC5518987; doi:10.1038/cr.2017.62), 2017-04-21
Supplement: cr201762x10.pdf [file cr201762x10.pdf]

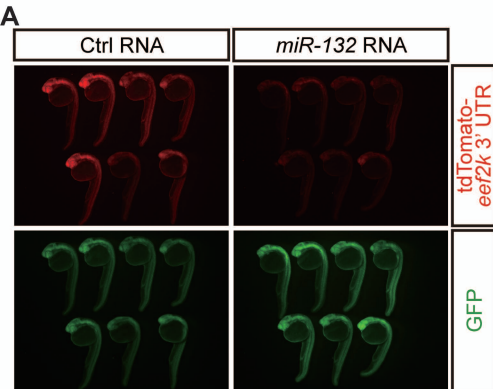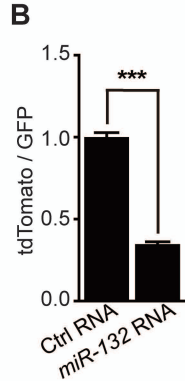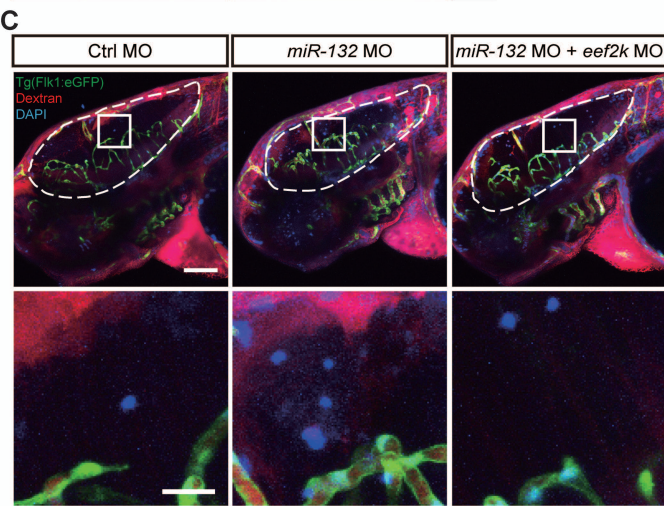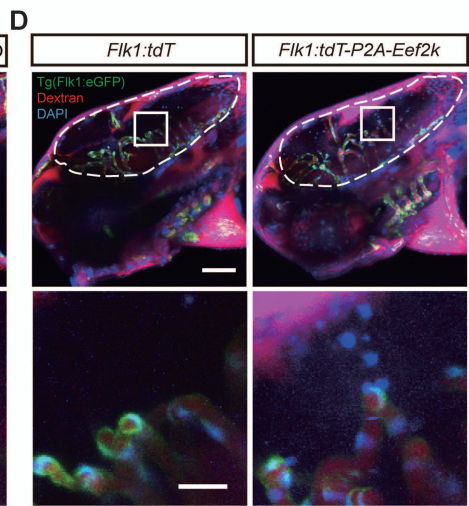

**Supplementary Information, Figure S10. Role of *eef2k* in mediating *miR-132* effects on brain vascular integrity.** (A and B) Representative images (A) and Summary (B) showing the injection of *miR-132* RNA together with *tdTomato-eef2k* 3' UTR mRNA and *GFP* mRNA reduces the expression of tdTomato in zebrafish embryos at 1 dpf. GFP signal is used as an internal control. (C) Representative images showing the rescue effect of *eef2k* knockdown on *miR-132* knockdown-induced DAPI leakage in the brain. (D) Representative images showing the effect of EC-specific *Eef2k* overexpression on DAPI leakage in the brain. Scale bars, 100  $\mu\text{m}$  (top) and 20  $\mu\text{m}$  (bottom) (C and D). Error bars, SEM. \*\*\* $P < 0.001$  (unpaired two-tailed Student's *t* test).
